# Supplementary material for: Proteasomal degradation of sphingosine kinase 1 and inhibition of dihydroceramide desaturase by the sphingosine kinase inhibitors, SKi or ABC294640, induces growth arrest in androgen-independent LNCaP-AI prostate cancer cells
Source: PubMed Central journal article supplement (PMC4941342; doi:10.18632/oncotarget.7693), 2016-02-25
Supplement: oncotarget-07-16663-s001.pdf [file oncotarget-07-16663-s001.pdf]

## Proteasomal degradation of sphingosine kinase 1 and inhibition of dihydroceramide desaturase by the sphingosine kinase inhibitors, SKi or ABC294640, induces growth arrest in androgen-independent LNCaP-AI prostate cancer cells

### Supplementary Materials

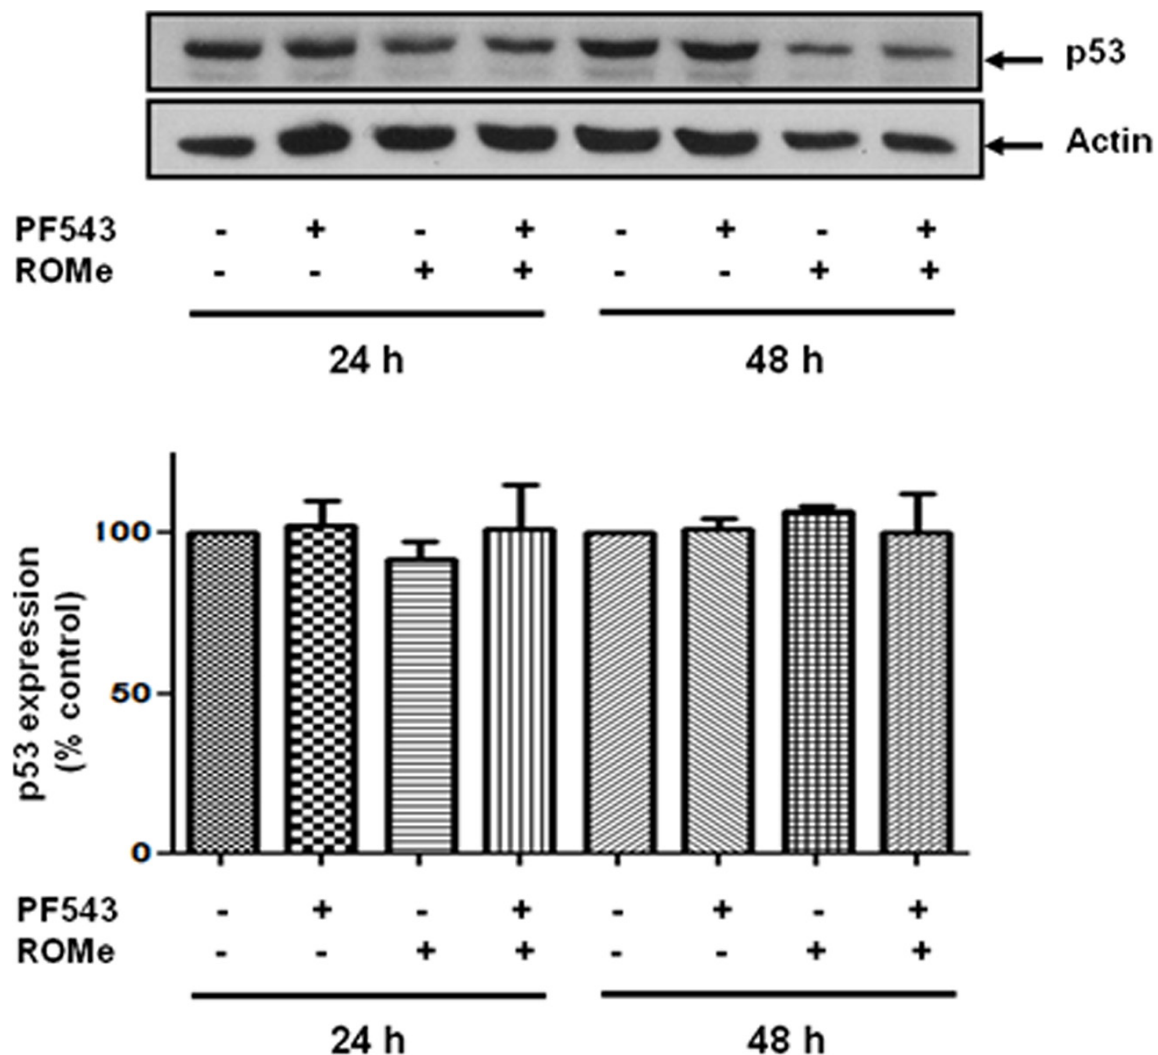

**Supplementary Figure S1: Lack of effect of ROME or PF-543 on p53 expression in androgen-independent LNCaP-AI cells.** LNCaP-AI cells were treated with ROME (10  $\mu$ M) and/or PF-543 (100 nM) for 24 h or 48 h. Western blot showing the lack of effect of ROME and PF-543 on p53 expression. Actin was used as a protein loading control. Results are representative of at least three independent experiments. Also shown is a bar graph of the quantification of the lack of effect of PF-543 (100 nM) and ROME (10  $\mu$ M) on p53 expression. Results are expressed as means  $\pm$  SD for  $n = 3$  experiments.
